1 **Influence of insertion sequences on population structure of phytopathogenic**  
2 **bacteria in the *Ralstonia solanacearum* species complex**

3 **Authors and affiliations:** Samuel TE Greenrod<sup>1,\*</sup>, Martina Stoycheva<sup>1</sup>, John Elphinstone<sup>2</sup>, Ville-  
4 Petri Friman<sup>1,\*</sup>

5 <sup>1</sup>Department of Biology, University of York, York, UK

6 <sup>2</sup>Fera Science Ltd, National Agri-Food Innovation Campus, Sand Hutton, York, UK

7 \*Corresponding authors

8 Email: [steg500@york.ac.uk](mailto:steg500@york.ac.uk)

9 Email: [ville.friman@york.ac.uk](mailto:ville.friman@york.ac.uk)

10 **Abstract (226 words)**

11 *Ralstonia solanacearum* species complex (RSSC) is a destructive group of plant pathogenic bacteria  
12 and the causative agent of bacterial wilt disease. Experimental studies have attributed RSSC virulence  
13 to insertion sequences (IS), transposable genetic elements which can both disrupt and activate host  
14 genes. Yet, the global diversity and distribution of RSSC IS are unknown. In this study, IS were  
15 bioinformatically identified in a diverse collection of 356 RSSC strains representing four phylogenetic  
16 lineages, and their diversity investigated based on genetic distance measures and comparisons with  
17 the ISFinder database. IS distributions were characterised using metadata on RSSC lineage  
18 classification and potential gene disruptions by IS were determined based on their proximity to coding  
19 sequences. In total, we found 24,732 IS belonging to eleven IS families and 26 IS subgroups, with over  
20 half of the IS found in the megaplasmid. While IS families were generally widespread across the RSSC  
21 phylogeny, IS subgroups showed strong lineage-specific distributions and genetically similar bacterial  
22 strains had similar IS contents. Further, IS present in multiple lineages were generally found in  
23 different genomic regions suggesting potential recent horizontal transfer. Finally, IS were found to  
24 disrupt many genes with predicted functions in virulence, stress tolerance, and  
25 metabolism, suggesting that they might be adaptive. This study highlights that RSSC insertion  
26 sequences track the evolution of their bacterial hosts, potentially contributing to both intra- and inter-  
27 lineage genetic diversity.

28

29

## 30 Introduction

31 Genetic variation is the raw material for selection and evolutionary change. In bacteria, genomic  
32 variation is generated by replication errors resulting in single nucleotide polymorphisms (SNPs), small  
33 and large genome rearrangements, and gene gain and loss via horizontal gene transfer (1). Further  
34 modifications that affect gene expression include epigenetic modifications via DNA methylation and  
35 gene disruptions caused by the movement of mobile genetic elements including integrated  
36 bacteriophages (prophages) and insertion sequences (IS). IS are small transposable elements which  
37 can move within a single genome or horizontally between different cells, generating within and  
38 between population genetic variation. IS have two main structural components: a transposase, the  
39 enzyme responsible for IS translocation; and transposase-flanking terminal inverted repeats, linked to  
40 transposase binding, DNA cleavage, and strand transfer (2). IS are highly diverse and are classified into  
41 families based on the gene sequence of their transposase, and further into subgroups based on the  
42 presence and order of transposase protein domains (for review see (3)). In contrast to transposons, IS  
43 seldom carry auxiliary genes that would have effects on host bacterial fitness (3). Instead, the impact  
44 of IS on host fitness is dependent on their genomic location. Most fitness-associated IS insertions are  
45 found within coding sequences, resulting in deactivation of particular genes. IS-mediated gene  
46 disruptions are prevalent across many bacterial taxa and have been found to alter bacterial traits  
47 including antimicrobial resistance (4–6), virulence (7–9), and metabolism (10,11). Moreover, IS can  
48 also alter host gene expression by inserting close to genes, which can result in gene promoter  
49 disruptions or even increased neighbouring gene expression as some IS contain either entire or partial  
50 promoter regions. Examples leading to differential gene expression caused by IS insertions include  
51 increased host resistance to antibiotics (12,13) and phages (14), and activation of virulence (15) and  
52 metabolic pathways (16,17).

53 While IS have been studied in both eukaryotic host-associated and free-living bacteria, most of the  
54 research on IS host fitness effects has focused on human bacterial pathogens (for review see: (18))  
55 and only a few studies have been published on plant pathogenic bacteria. In the rice pathogen  
56 *Xanthomonas oryzaei*, IS have been shown to inactivate genes in the *gum* cluster responsible for the  
57 biosynthesis of extracellular polysaccharides (19), in addition to disrupting the virulence-related *purH*  
58 gene (20). Moreover, IS virulence gene disruptions have been found in *Pseudomonas syringae* pv.  
59 *phaseolicola*, responsible for halo blight of the common bean, via IS insertion into a potential  
60 avirulence gene (21). Notably, in the same genera, IS have also been linked to the horizontal transfer  
61 of virulence genes (22–24), suggesting they likely play a role in both elevated and reduced host  
62 virulence. Recently, IS content was also investigated in the plant pathogenic bacterial *Ralstonia*

63 *solanacearum* species complex (RSSC), a causative agent of bacterial wilt disease, through a genomic  
64 analysis of 62 complete RSSC genome sequences in the NCBI database (25). This study identified 20 IS  
65 families, including some which were widespread across the bacterial phylogeny and others which were  
66 only found in specific host phylogenetic lineages. IS were often located nearby, or inserted into, genes  
67 with potential roles in virulence, resistance to oxidative stress, and toxin production, potentially  
68 affecting the fitness of their hosts (25). These findings supported previous analyses of RSSC IS which  
69 identified disruptions in type III effectors (26) and in the global virulence regulator *phcA* (27), the latter  
70 of which resulted in spontaneous phenotypic conversion between non-virulent and virulent pathogen  
71 genotypes. It was also recently shown that RSSC IS are highly mobile under lab conditions and may  
72 contribute to host competitiveness and environmental stress tolerance (28). However, thus far our  
73 understanding of IS in RSSC is based on experimental studies of individual strains (27,28) and a small  
74 number of genomes derived from publicly available databases (29). As a result, the wider diversity and  
75 distribution of IS in RSSC is unknown. In addition, we poorly understand to what extent IS-driven  
76 variation follows the host phylogeny, concealing whether IS generally transmit vertically or if they are  
77 more often characterised by horizontal movement between lineages.

78 RSSC strains have broad host ranges infecting over 200 plant species within at least 50 families (30,31).  
79 They contain a bi-partite genome comprised of a chromosome and a megaplasmid, and are genetically  
80 diverse, being classified into four lineages, termed phylotypes (32). Phylotypes generally follow their  
81 geographical origin: Phylotype I includes strains originating primarily from Asia, Phylotype II from  
82 America, Phylotype III from Africa and surrounding islands in the Indian ocean, and Phylotype IV from  
83 Indonesia, Japan, and Australia (33). The four phylotypes have been redefined as three separate  
84 species, including *R. solanacearum sensu stricto* (Phylotype II), *R. pseudosolanacearum* (Phylotypes I  
85 and III) and an array of *R. syzygii* subspecies (Phylotype IV) (34). Considerable variation exists between  
86 and within *R. solanacearum* lineages regarding their metabolic versatility (35), tolerance to  
87 environmental stresses including starvation and low temperatures (36,37), and disease severity (38).  
88 This has been linked to a diverse accessory genome (39,40) which includes mobile genetic elements  
89 such as prophages (29,41). A recent analysis of RSSC prophages found that, while prophages were  
90 highly diverse, they were generally bacterial host phylotype-specific (41). In addition, prophage  
91 content tightly followed the host phylogeny with genetically similar hosts containing similar  
92 prophages. Some IS families have been reported to also have lineage-specific distributions (25), being  
93 exclusively found in specific RSSC species. Therefore, they may have similar distribution patterns to  
94 prophages and have limited horizontal transfer between compared to within bacterial lineages.  
95 Addressing this hypothesis requires a deeper exploration of the relationship between IS content and  
96 the host phylogeny and an assessment of potential IS fitness effects across the RSSC.

97 The large diversity of the strains within the complex and the economic losses associated with the  
98 disease make the RSSC a salient target for IS content analysis. While a recent study made a significant  
99 contribution to understanding RSSC IS using publicly available RSSC genomes (25), it had a sampling  
100 bias with low representation of strains from phylotypes IIA and IIB, missing a subset of hosts which  
101 are cold-adapted (36). In this study, IS were identified in a new representative collection of 356 RSSC  
102 isolates. These included isolates from all four phylotypes and six continents, with extensive sampling  
103 of phylotypes I and IIB. We specifically aimed to: i) characterise the total diversity and distribution of  
104 IS in RSSC, ii) assess the relationship between IS content and the host phylogeny; and iii) investigate  
105 the potential impact of IS movement on host fitness-associated genes. IS were initially identified in 27  
106 Nanopore-assembled and five complete reference genomes with ISEScan (42) to determine IS  
107 diversity. Representative IS were then used to identify IS in all isolates using short read data with  
108 ISMapper (43). IS distributions were characterised by assessing lineage-specificity, with the  
109 relationship between IS content and host genetic background determined by comparing IS Bray-Curtis  
110 and host genetic dissimilarities. Finally, potential IS fitness effects were investigated based on their  
111 proximity to neighbouring genes.

112

## 113 **Methods**

### 114 ***RSSC hosts, sequencing, and genome assembly***

115 RSSC hosts were selected from the National Collection of Plant Pathogenic Bacteria (NCPBP) and other  
116 reference strains maintained at Fera Science Ltd., York, UK. Genomic DNA extraction was performed  
117 on 384 isolates using Qiagen DNeasy Blood and Tissue Kit (DNeasy® Blood & Tissue Handbook, Qiagen,  
118 Hilden, Germany, 2020) followed by quantification of double stranded DNA product using Quantit  
119 dsDNA Assay Kit Broad range and Nanodrop (Thermo Fisher Scientific, Waltham, MA, USA). Host DNA  
120 was sequenced using Illumina MiSeq at the Earlham Institute, UK. 27 isolates were chosen for long  
121 read re-sequencing with Oxford Nanopore MinIon which was performed by the technological facility  
122 at the University of York. Guppy (<https://nanoporetech.com/>) was used for basecalling and hybrid  
123 assemblies were produced using the Unicycler (v0.4.8) pipeline on strict mode (44). After assembly  
124 some small contigs were filtered out based on sequence similarity and size. Short read sequence  
125 quality was assessed using FastQC (45) and trimming of adapters and low-quality ends was performed  
126 using Trimmomatic (v0.39) (46). Genomes were then assembled into draft assemblies using Unicycler  
127 (v0.4.8) on strict mode (44). To classify the genomes, a pangenome analysis was performed on 357  
128 high quality genome assemblies plus 48 complete genomes downloaded from NCBI Genbank

129 (Accessions available in Supplementary Data) and *R. picketti* 12b used as an outgroup. Core genome  
130 alignment was generated using Panaroo (v1.2.4) (47) with strict mode and MAFFT aligner (48).  
131 Phylogenetic tree was then constructed with IQ-TREE (49) and GTR+G4 model and monophyletic  
132 branches were assigned to phylotypes based on the close clustering with known phylotype (Figure S1;  
133 Table S1).

#### 134 ***IS detection in Nanopore and reference genomes***

135 IS were detected in 27 Nanopore-assembled genomes (Table S2) and five complete reference  
136 genomes (GMI1000, phylotype I; K60, phylotype IIA; UY031, phylotype IIB; CMR15, phylotype III;  
137 PSI07, phylotype IV), representing different phylotype lineages in the RSSC phylogeny. Firstly, putative  
138 full-length IS were identified with ISEScan v.1.7.2.3 (42) using the removeShortIS parameter to remove  
139 partial IS copies. In total, 2,768 full length IS were identified. These were filtered by removing IS  
140 duplicates based on whether they belonged to the same IS family and had the same length or if they  
141 had identical terminal inverted repeats. After filtering, 861 IS were retained and used for subsequent  
142 analyses. IS diversity was then assessed by determining IS sequence similarity using Mash v2.2 (50)  
143 and generating a pairwise Mash distance matrix using the “mash triangle” function with sketch size =  
144 10,000. IS were clustered based on sequence similarity using K-means clustering with the R package  
145 ‘pheatmap’ v1.0.12. The optimal number of clusters was determined using a Silhouette plot with the  
146 R package ‘factoextra’ v1.0.7. A total of 66 IS clusters were identified and one IS representative was  
147 selected at random from each cluster. To determine IS identities, IS representatives were blasted  
148 against the ISFinder database (<https://isfinder.biotoul.fr/>) with successful hits determined using an E-  
149 value <  $E^{-50}$  threshold. For successful hits, the ISFinder database copy of the IS was downloaded.

#### 150 ***IS detection in RSSC isolates from short read data***

151 IS were identified in all 356 RSSC isolates using only short read data with ISMapper v.2.0.2 (43). Briefly,  
152 ISMapper maps short read data to reference IS, identifying reads that map to and overhang the 3’ and  
153 5’ IS flanks. Mapped reads are then further mapped to an annotated reference bacterial genome and  
154 IS positions are determined where 3’ and 5’ flanking reads both map to similar genomic locations.  
155 Representative IS sequences downloaded from the ISFinder database were used as references. As  
156 gene content varies between RSSC lineages, different reference bacterial genomes were used  
157 depending on the lineage of the isolate being analysed. As a result, depending on their phylotype  
158 classification, reads from isolates were mapped to GMI1000, K60, UY031, CMR15, and PSI07 strains.  
159 Annotated bacterial genomes (GenBank format file, gbff) were downloaded from the NCBI database  
160 (Table S3). After running ISMapper, IS hits were filtered to remove potential false positives. IS with  
161 unknown 5’ or 3’ coordinates were removed. Further, IS hits that overlapped within the same isolates

162 were de-duplicated as they likely represent different reference IS mapping to the same location. As all  
163 overlaps occurred with IS from the same family, the remaining de-deuplicated IS were given an  
164 “Unknown\_” + IS family label (e.g Unknown\_IS5). Finally, IS that were found to disrupt transposases,  
165 likely representing intra-IS insertions, were removed. This is because IS that map inside multi-copy  
166 genes will map to all copies irrespective of the true IS content and therefore may generate spurious  
167 hits (43). To see whether IS detection with short read data has lower accuracy than with long read  
168 assemblies, IS copy number from each method was compared using the 27 Nanopore-sequenced  
169 strains. While there was a significant correlation in IS copy number when using short and long read  
170 data (Kendall’s  $p < 0.01$ ; Figure S2A), short read data had lower IS detection power, identifying on  
171 average only ~73% of the IS found with long read assemblies. Therefore, to fairly compare IS between  
172 all strains, IS were only detected with short read data. Moreover, as read depth can affect IS detection  
173 power, the average per base read depth for each isolate was determined and compared between host  
174 phylotype lineages (Figure S2B). Read depth was calculated by first aligning paired-end reads to the  
175 isolate chromosome or megaplasmid using the Burrows-Wheeler aligner (51) “bwa mem” command.  
176 Per base read depth was then determined using SAMtools (52) “sort” and “depth” commands,  
177 including bases with no coverage. Although phylotype IIB strains had significantly greater read depth  
178 than phylotype I (Kruskal-Wallis:  $\chi^2 = 75.1$ ; d.f = 4,  $p < 0.01$ ), there was no significant difference in read  
179 depth for all other pairwise comparisons. Further, as ~99% of isolates from each phylotype (except for  
180 IIA with 93%) had an average per base read depth  $> 30x$  (average read depth: chromosome =  $67.9x \pm$   
181  $17$  s.d; megaplasmid =  $59.9x \pm 14.2$  s.d), which is above the suggested threshold for correct IS  
182 detection (43), read depth likely had a minimal impact on IS detection and copy number.

### 183 ***Determining the relationship between IS content and host genetic background***

184 The relationship between IS content and host genetic background was first assessed by comparing IS  
185 profiles between host lineages using principal coordinate analysis. Differences in IS subgroup content  
186 between isolates were determined by calculating IS Bray-Curtis dissimilarities with the R package  
187 ‘vegan’ v.2.5-7, which accounts for presence, absence, and relative abundance of IS subgroups in host  
188 genomes. Principal coordinate analysis of Bray-Curtis dissimilarities was conducted using the R  
189 package ‘ape’ v.5.6-1 (53) and IS content differences between phylotypes were tested statistically  
190 using ANOSIM with 9,999 permutations.

191 IS content and bacterial host genetic background was further compared by calculating the congruence  
192 between the RSSC phylogeny and a UPGMA tree constructed using IS Bray-Curtis dissimilarities. The  
193 IS Bray-Curtis UPGMA tree was constructed from a pairwise Bray-Curtis dissimilarity matrix using the  
194 R package ‘phangorn’ v.2.8.1 (54). A tanglegram between the RSSC ML tree and the IS Bray-Curtis

195 UPGMA tree was generated with functions in the R package ‘ape’, using the R package ‘phytools’ v.1.0-  
196 1 (55) to rotate the RSSC ML tree to minimise connected lines crossing between the trees. Congruence  
197 between the RSSC ML tree and the IS Bray-Curtis UPGMA tree was assessed using Procrustes Approach  
198 to Cophylogenetic Analysis (PACo) v.0.4.2 (56) in R. Briefly, cophenetic distance matrices were  
199 constructed using the IS Bray-Curtis and RSSC phylogenetic trees. The distance matrices were then  
200 transformed into principal coordinates and compared with each other using a Procrustean super-  
201 imposition with a null model (host phylogenetic tree ordination does not predict IS UPGMA tree  
202 ordination, i.e., there is no congruence) to determine tree congruence. Statistical significance was  
203 calculated based on 1,000 network randomizations under the “r0” randomization model.

204

## 205 **Data visualisation and statistical analysis**

206 Statistical analyses and data visualisation were carried out using Microsoft Excel v.2102, R v.4.0.3 and  
207 RStudio v1.4.1103. The difference in IS copy number between short read IS detection (ISMMapper) and  
208 long read detection (ISEScan) was determined using a Kendall-rank correlation. Read depth and IS  
209 copy number was compared between phylotypes using Kruskal-Wallis tests followed by Dunn’s post-  
210 hoc test. The difference in IS copy number and the number of IS close to (< 100 bp from start codon)  
211 or inside genes in the chromosome and megaplasmid were tested using paired t-tests. Graphs and  
212 heatmaps were made using the R package ‘ggplot2’ v.3.3.3. The Bray-Curtis UPGMA and ML  
213 phylogenetic trees were visualised using the R ‘ggtree’ package v.2.1.4 (57).

214

## 215 **Results**

### 216 **Insertion sequence abundance and distribution across *Ralstonia solanacearum* species complex**

217 We first compared insertion sequence content and distribution across the genomes of 356 RSSC  
218 bacterial isolates. All bacterial isolates contained IS and a total of 24,732 IS were identified. A  
219 significantly higher number of IS were identified in the megaplasmid (12,734 IS) than in the  
220 chromosome (11,998 IS;  $t = 9.52$ ; d.f. = 355;  $p < 0.001$ , Figure S3) despite the megaplasmid being  
221 approximately half the size of the chromosome (32). Insertion sequences belonged to eleven IS  
222 families that included IS5, IS3, IS110, IS256, IS21, IS701, ISL3, IS4, IS630, IS1595, and IS1182. The most  
223 prevalent IS families were IS5 (78.9%) and IS3 (15.4%), with the remaining families each comprising  
224 less than 2% of the total number of IS (Figure 1A). However, greater IS prevalence in the megaplasmid  
225 was not consistent across all IS families and IS from IS110 and IS3 families were predominantly

226 detected in the chromosome. IS copy number was significantly different between phylotypes overall  
227 (Kruskal-Wallis:  $\chi^2 = 151.1$ ; d.f = 4,  $p < 0.001$ ). However, this result was driven by uneven  
228 representation of isolates across phylotypes (I (59), IIA (15), IIB (269), III (8), and IV (5)), which resulted  
229 in overrepresentation of two insertion sequences that were common to phylotype IIB bacterial  
230 isolates: IS5 and IS3 (Figure 1C). Nonetheless, IS5 and IS3 were highly prevalent across the RSCC  
231 phylogeny, despite the oversampling of phylotype IIB isolates (Figure 1B, C). In addition to IS5 and IS3,  
232 certain lower abundance IS families, such as IS110 and IS256, were also present across the phylogeny.  
233 However, a small number of families were found in specific lineages. For example, phylotype I isolates  
234 almost uniquely contained ISL3 and IS4 and most of the IS701 (89.6%) and IS1595 (72%) IS. In addition,  
235 phylotype IIB exclusively contained IS21 IS. Therefore, whilst RSCC IS family content was dominated  
236 by IS5 and IS3, lineage-specific presence-absence patterns were observed across the phylogeny.

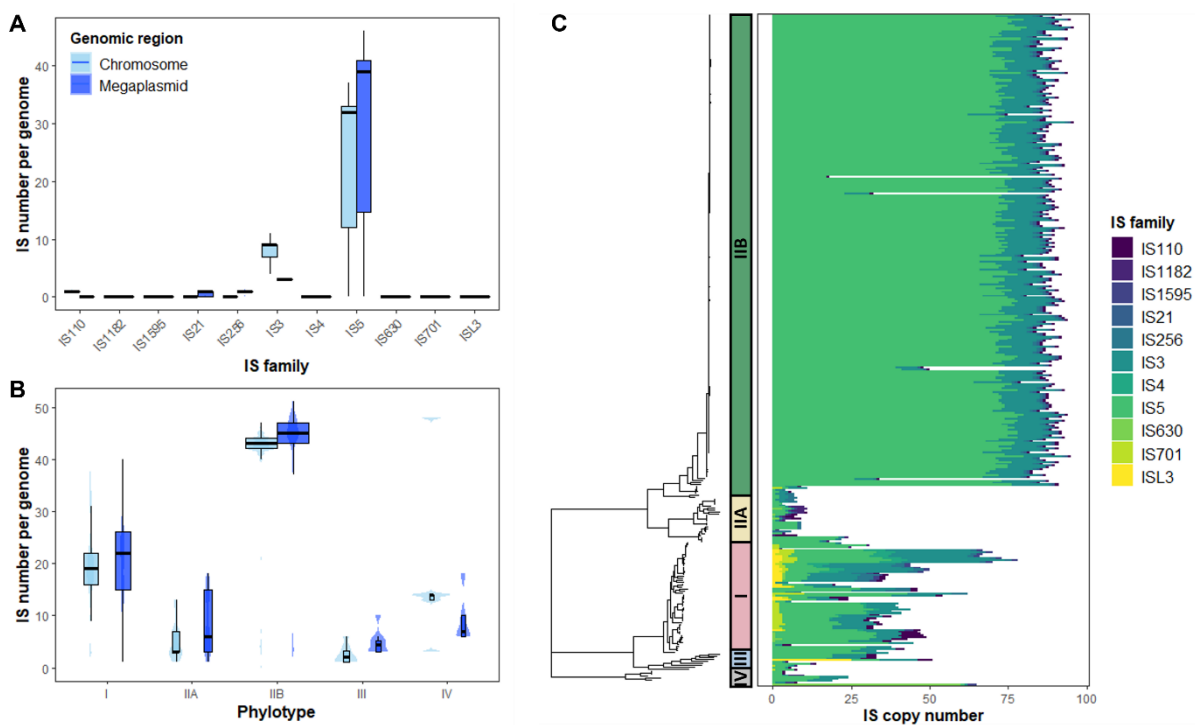

237 **Figure 1. IS number and content varies across the RSCC phylogeny.** A) Box plot and violin plot of IS prevalence for each IS  
238 family for both the chromosome and megaplasmid. B) Box plot and violin plot showing the number of IS in isolates from  
239 each lineage in the phylogeny. For both A and B, IS prevalence in both the chromosome (light blue) and the megaplasmid  
240 (dark blue) is shown. C) Left side is RSCC phylogeny with coloured bars showing phylotype label, right side is a heatmap of IS  
241 prevalence coloured by IS family

### 242 ***Insertion sequence content tracks host phylogeny at IS subgroup level***

243 IS family distributions were further investigated by looking at the distributions of intra-family IS  
244 subgroups (Figure 2A). While the highly prevalent IS5 and IS3 families were found to contain eight and  
245 nine IS subgroups, respectively, only individual IS subgroups were identified for other IS families. In  
246 contrast to IS5 and IS3 families that were generally widespread and found in all lineages, IS5 and IS3



247 subgroups showed lineage-specific distributions. The IS5 subgroup IS1021 comprised most of the IS5  
248 IS in the large clonal IIB sub-lineage and was present only in low abundance in other lineages. The  
249 remaining IS5 subgroups were primarily found in phylotype I isolates, although some were also found  
250 in phlotypes IIA and IV. Similarly, IS3 subgroups in the clonal IIB sub-lineage primarily included  
251 ISRso10 and ISRso20, whereas the remaining IS3 subgroups were mainly found in phylotype I. IS  
252 subgroup lineage-specificity was further verified using a principle-coordinate analysis based on host  
253 IS subgroup Bray-Curtis dissimilarities (Figure S4). Phlotypes could be significantly distinguished  
254 based on their IS contents (ANOSIM:  $p < 0.001$  for all lineages), with particularly strong clustering  
255 between the clonal IIB sub-lineage and phylotype I isolates. Notably, a more diverse cluster was also  
256 observed containing isolates from all phlotypes, including non-clonal IIB isolates and all IIA, III, and  
257 IV isolates. Although overlaps were small with phylotype III isolates, the general clustering between  
258 these lineages suggests that their IS contents were similar. Together, these findings suggest that intra-  
259 family IS subgroups were mainly phylotype-specific.

260 To test if the observed host lineage-specificity of IS subgroups could be explained by host  
261 genetic similarity, we measured the congruence between the RSSC phylogeny and a UPGMA tree  
262 constructed based on IS subgroup Bray-Curtis dissimilarities (Figure 2B). Significant congruence was  
263 detected between the total RSSC phylogeny and Bray-Curtis UPGMA tree ( $M^2_{xy} = 0.34$ ,  $p < 0.001$ ,  $N =$   
264  $1,000$ ). To ensure this wasn't biased by the large clonal IIB sub-lineage, the analysis was repeated for  
265 each lineage independently, including phlotypes III and IV which had relatively lower sampling sizes.  
266 Except for the small sampling size phylotype III, significant congruence was found when analysing  
267 lineages independently (phylotype I -  $M^2_{xy} < 0.001$ ,  $p < 0.001$ ,  $N = 1,000$ ; IIA -  $M^2_{xy} < 0.001$ ,  $p < 0.001$ ,  
268  $N = 1,000$ ; IIB -  $M^2_{xy} = 0.005$ ,  $p < 0.001$ ,  $N = 1,000$ ; III -  $M^2_{xy} < 0.001$ ,  $p = 0.052$ ,  $N = 1,000$ ; IV -  $M^2_{xy} <$   
269  $0.001$ ,  $p < 0.05$ ,  $N = 100$ ) and each lineage-level congruence comparison had improved goodness-of-  
270 fit compared to the congruence analysed at the level of the whole strain collection. This analysis  
271 therefore confirms that genetically similar hosts contain similar IS contents.

### 272 ***Insertion sequence subgroups are found in different genomic regions in different host lineages***

273 While IS subgroups were generally lineage-specific, they were often found in low abundance in other  
274 lineages, indicative of recent horizontal IS gain events rather than vertical transmission from a  
275 common ancestor. This was investigated by comparing the prevalence of IS in the chromosome and  
276 megaplasmid between lineages (Figure S5). Some IS subgroups were found in the same genomic  
277 region in all lineages. For example, the IS3 subgroup ISRso10 was mainly inserted into the  
278 chromosome, and the IS5 subgroups IS1021, IS1405, IS1421, and ISRso18 were primarily found in the  
279 megaplasmid. However, 42% of IS subgroups (11/26) had different genomic locations that depended

280 on the host lineage. For example, the IS1182 subgroup ISBma2 was found in the chromosome in  
 281 phylotype IIB and III strains but was only found in the megaplasmid in phylotype IIA. In addition, IS  
 282 subgroup genomic region was not conserved within IS families; in phylotype IIB isolates, the IS3  
 283 subgroups ISRs010 and ISRs020 were found in the chromosome and megaplasmid, respectively. In  
 284 contrast, especially in phylotype IIB, IS5 subgroups were primarily found in the megaplasmid. These  
 285 results suggest that, irrespective of their family background, IS subgroups are found in different  
 286 genomic regions within different bacterial host lineages.

A

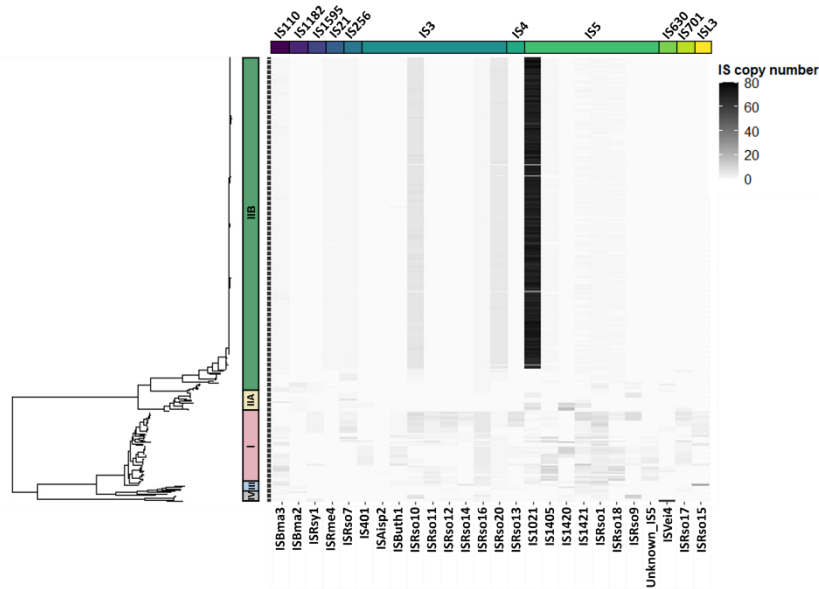

B

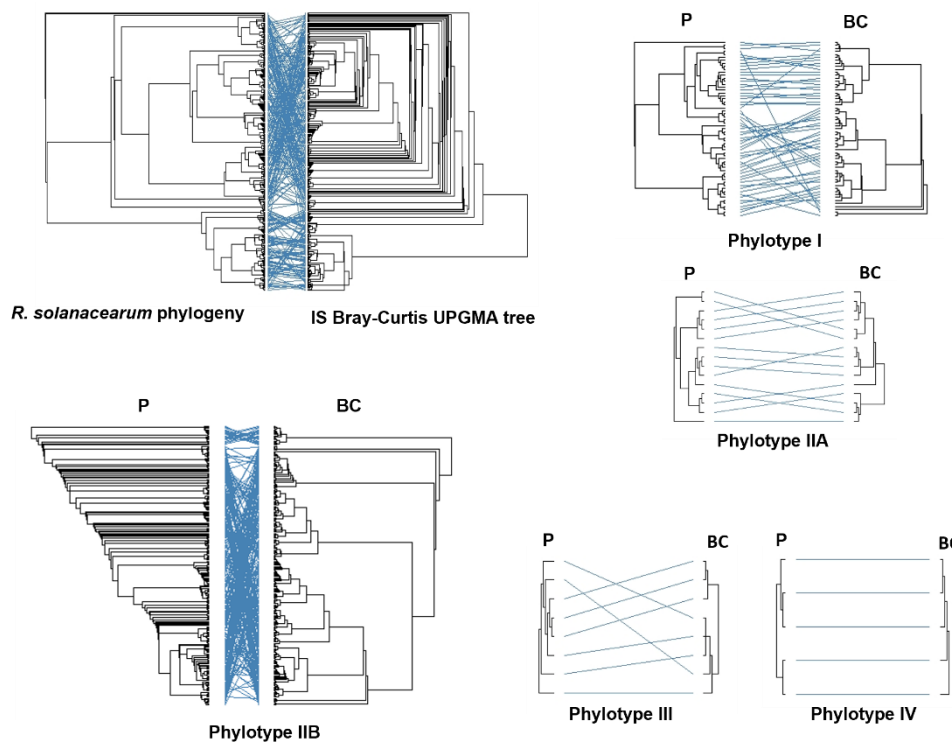

287 **Figure 2. IS subgroups generally show host lineage-specificity and widespread IS are found in different genomic regions**  
288 **depending on host lineage.** A) Heatmap of IS subgroup prevalence across the RSSC phylogeny. IS subgroups clustered by IS  
289 family, shown with coloured bars above the heatmap. B) Tanglegrams showing the congruence between RSSC phylogeny  
290 (left side) and UPGMA tree (right side) calculated using Bray-Curtis dissimilarity of IS presence. The first tanglegram shows  
291 congruence for the whole phylogeny and the other plots show congruence within lineages. Phylogeny is labelled with P and  
292 UPGMA tree is labelled with BC (Bray-Curtis).

293 ***Insertion sequences potentially disrupt genes associated with virulence and competitiveness and***  
294 ***may contribute to inter-phylogeny trait variation***

295 In the RSSC, IS insertions have been shown to occur near to or inside of type III effectors and global  
296 virulence regulators, affecting host virulence and phenotypic plasticity (27,29). Therefore, the  
297 proximity of IS to neighbouring genes was investigated. The distance of IS to their closest neighbouring  
298 gene was found to have a roughly exponential distribution, with most IS being physically close to  
299 coding sequences (Figure 3, inset). Indeed, 71.4% of all IS identified were found less than 100bp from  
300 a neighbouring gene's start codon, including 78.7% of chromosomal IS and 66.4% of megaplasmid IS.  
301 Notably, although coding sequences comprise approximately 86.8% of the RSSC genome (32), only  
302 4.9% of IS were predicted to disrupt genes (7.1% of chromosomal IS and 2.8% of megaplasmid IS)  
303 potentially changing their function. Despite IS being significantly more prevalent in the megaplasmid  
304 than the chromosome, isolates contained significantly fewer gene-proximate (closer than < 100 bp to  
305 a start codon) and intra-genic IS in the megaplasmid than in the chromosome ( $t = -15.60$ ; d.f. = 353;  $p$   
306 < 0.001, Figure S6). Moreover, IS gene disruptions were not caused by all IS subgroups (Figure S6), and  
307 subgroups that mainly inserted into inter-genic regions were found in most IS families, including IS5  
308 and IS3, which suggests that potential gene disruptions were not IS family-specific. However, while  
309 some IS subgroups caused gene disruptions more often than others, the proportion of IS insertions  
310 within genes differed between lineages (Figure S7). Five IS subgroups, including ISAisp2, ISRso14,  
311 ISRso16, ISRso13, and ISRso9 caused > 90% of their gene disruptions in individual lineages, and only  
312 eight IS subgroups caused > 10% IS disruptions in more than two lineages.

313 In total, IS were found to disrupt 335 genes across all isolates, including 38 genes that were  
314 disrupted multiple times in separate loci. This excludes hypothetical proteins, whose functions remain  
315 unknown, which were disrupted in 95 loci. Genes that were disrupted by IS in more than five isolates  
316 were analysed further (Figure 3). Of these, 32 disrupted genes were identified and associated with  
317 potential fitness functions, including bacterial virulence, antibiotic and oxidative stress tolerance,  
318 protein modification, cellular metabolism, and RNA-binding. Most gene disruptions (20/32) occurred  
319 in closely related isolates in phylotype I, indicating they could have arisen via vertical transmission  
320 from a common ancestor. However, some gene disruptions also occurred in a small number of more

321 distantly related isolates while others, such as those in S8 family serine peptidase, RHS repeat protein,  
 322 and LysR transcriptional regulator, were mainly found in distantly related isolates across multiple  
 323 lineages. Except for IS disruptions in the clonal IIB sub-lineage, widespread gene disruptions were  
 324 generally caused by multiple IS subgroups in different isolates, suggesting they likely represent parallel  
 325 insertions. IS disruption of these genes may be under stronger selection and provide a fitness benefit  
 326 to their hosts.

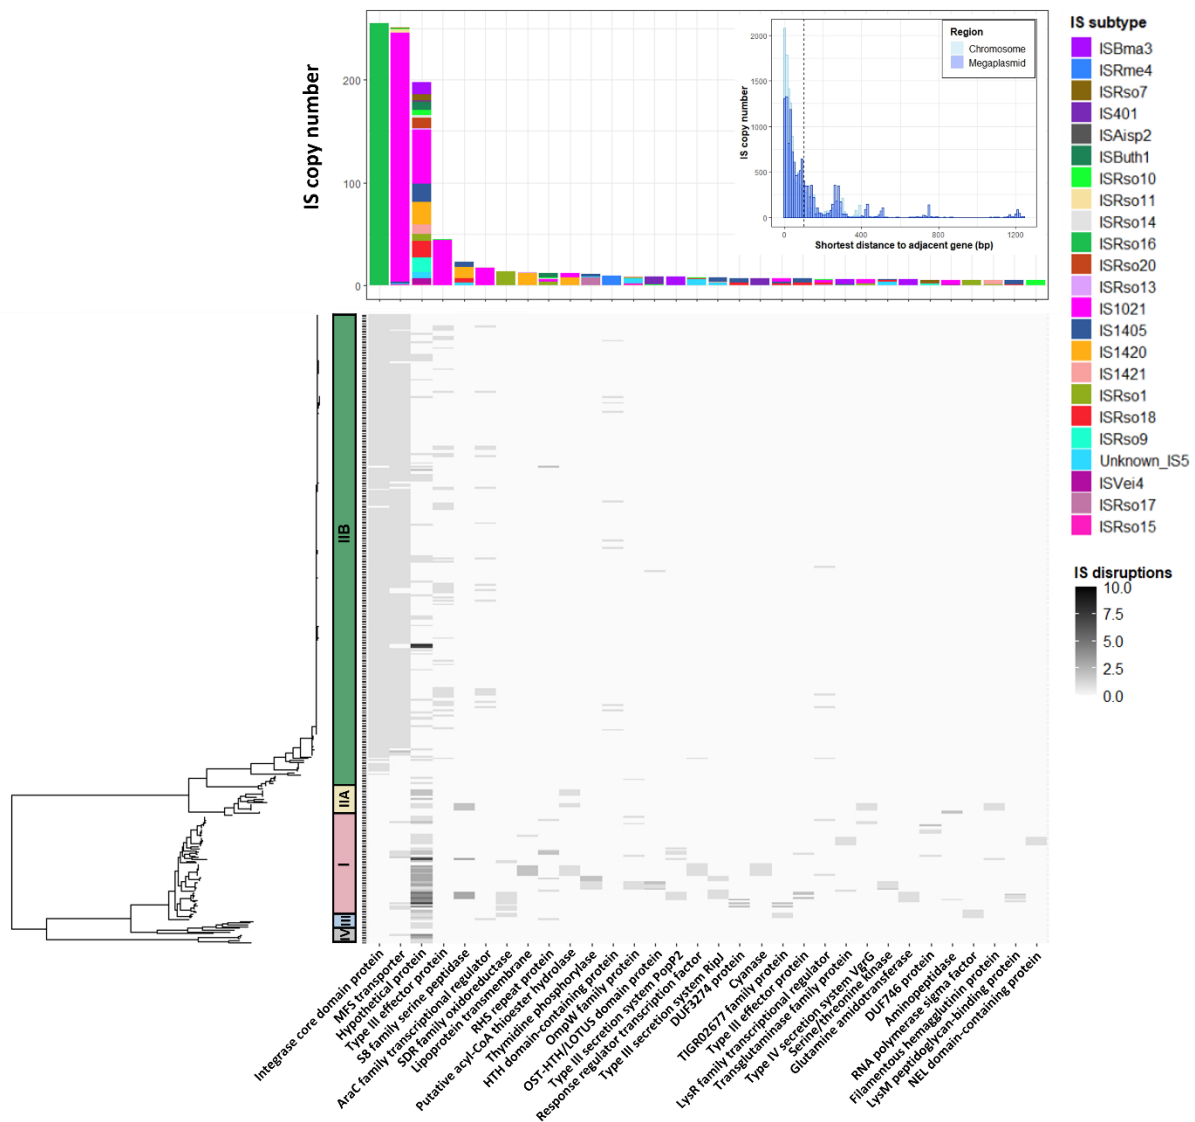

327  
 328 **Figure 3. IS disrupt genes across the phylogeny in a lineage-specific manner.** Inset) Histogram of the shortest predicted  
 329 distance between each IS and its adjacent gene's start codon. Histograms for chromosomal and megaplasmid IS are overlaid  
 330 and coloured separately. Dotted vertical line shows 100 bp threshold. Bottom; heatmap showing the number of IS-mediated  
 331 disruptions in different gene types across the phylogeny. Only genes that contained disruptions in five or more isolates are  
 332 shown. Genes are ordered by frequency of IS disruption. Top; stacked bar chart showing the IS subgroup distribution for  
 333 each gene disrupted.

334

## 335 Discussion

336 Insertion sequences contribute to genetic diversity in bacterial pathogens, affecting a myriad of traits  
337 including metabolism (10,58), virulence (7,8,59), and stress tolerance (4,6). In this study, we analysed  
338 insertion sequence content in the plant pathogenic RSSC bacterium using a diverse, global collection  
339 of 356 RSSC strains. IS were identified in all strains and belonged to eleven IS families, the most  
340 prevalent being from the IS5 and IS3 families. Although IS families tended to be widespread, IS  
341 subgroups were host lineage-specific and genetically similar hosts had similar IS contents. IS subgroups  
342 were rarely found in multiple lineages and, when found, were inserted into different genomic regions  
343 with different lineages, indicative of potential horizontal movement between lineages. IS were  
344 generally close to neighbouring genes and caused disruptions in several genes, potentially associated  
345 with bacterial virulence and stress tolerance. Overall, our results suggest that IS elements might be  
346 evolving in tandem with their hosts, potentially contributing to the phenotypic diversity and fitness of  
347 the RSSC.

348 A recent analysis of RSSC insertion sequences provided important insights into the potential  
349 diversity and distribution of IS across the RSSC (25). Here we built on this analysis by including a more  
350 representative sampling of new RSSC genomes, including isolates from IIA and IIB phylotype groups  
351 that were underrepresented in the previous study. Overall, our results support the previous findings  
352 (25). IS were identified in all isolates analysed although IS copy number varied across the RSSC. We  
353 found that a large clonal phylotype IIB sub-lineage contained the greatest number of IS, followed by  
354 phylotype I and IV, with IIA, III, and non-clonal IIB isolates containing very few IS. Excluding the clonal  
355 IIB sub-lineage, our results support previous work suggesting phylotype I has the highest IS copy  
356 number (25). Further, the most prevalent IS were from the IS5 and IS3 families, which were  
357 widespread across the RSSC with high copy number in the clonal IIB sub-lineage and in phylotype I  
358 isolates. Therefore, these IS families are likely the dominant IS families in the RSSC. However, in  
359 contrast with previous findings, non-clonal IIB isolates had very low IS copy number, and across all  
360 lineages, we detected fewer IS copies per isolate than were found previously. This is likely due to  
361 methodological differences as, while Goncalves *et al* (25) identified IS in complete genome sequences,  
362 we identified IS with short read data which had lower IS detection power than with long read  
363 assemblies. This could be because IS detection with short reads depends on reference IS identified  
364 from long read assemblies and we identified fewer reference IS than were found previously. In  
365 addition, we filtered out intra-IS insertions to avoid spurious hits which, depending on the prevalence  
366 of intra-IS insertions across the RSSC, may have resulted in under-estimated IS copy numbers.

367 Consistent with the findings of Goncalves *et al* (25), we found that most IS families (6/11) that  
368 were less abundant were also less widespread: ISL3, IS701, IS4, IS630, IS1595, and IS21. IS had low  
369 prevalence (collectively 2.7% of total IS) and were mainly found in specific lineages (phylotype I: ISL3,  
370 IS701, IS4, IS1595; phylotype IIB, IS21; phylotype IV, IS630). However, an important extension in our  
371 analysis included assessing the distribution of intra-family IS subgroups, enabling the detection of  
372 nuanced patterns that sometimes occur within IS families (60). We found that widespread IS5 and IS3  
373 families contain many IS subgroups which have strong lineage-specific distributions. Indeed, host  
374 lineages were significantly distinguishable based on IS subgroup content alone. Consequently, IS  
375 subgroups appear to be largely restricted within distinct host lineages. Differential IS family copy  
376 numbers between lineages have previously been detected in other pathogens (61) and observed to  
377 rise in long-term experimental studies (62). Whilst it is unclear whether these IS families included  
378 single or multiple IS subgroups, our results suggest that IS subgroups should be considered in future  
379 analyses as their distributions may differ between lineages that contain similar IS family copy numbers.  
380 The relationship between IS content and host genetic background was further analysed by calculating  
381 the congruence between the host phylogenetic and a UPGMA tree constructed based on IS subgroup  
382 Bray-Curtis dissimilarities. We found that there was significant congruence between the trees overall  
383 and independently within lineages, suggesting that genetically similar hosts contain similar IS. These  
384 findings mirror those of a recent study conducted on RSSC prophages (41) which found similar lineage-  
385 specific distributions and detected significant congruence between prophage content and the host  
386 phylogenetic tree. Therefore, multiple mobile genetic elements in RSSC appear to track the evolution  
387 of their hosts and act as sources of genetic diversity between lineages.

388 In contrast with previous analyses (25), we found significantly more IS in the megaplasmid  
389 than the chromosome. This was surprising given the RSSC megaplasmid is approximately half the size  
390 of the chromosome (32). One potential explanation is that, although the chromosome and  
391 megaplasmid have a similar number of coding sequences relative to their size, over 90% of the RSSC  
392 core genome is found in the chromosome (32,63). This includes most house-keeping genes (32) whose  
393 disruption would likely reduce host fitness. Therefore, given the megaplasmid mainly contains  
394 accessory genes with non-essential functions, it may be under weaker purifying selection against IS  
395 insertions and so undergoes greater IS propagation. Notably, greater megaplasmid IS prevalence was  
396 not found for all IS families and the IS110 and IS3 families were mainly found in the chromosome,  
397 likely due to their chromosomal prevalence in the large clonal IIB sub-lineage. Although many IS have  
398 little to no target specificity (64), IS distributions were inconsistent with random insertions into the  
399 chromosome and megaplasmid; if IS insertions were random then the megaplasmid should have  
400 proportionately fewer insertions compared to the chromosome in all lineages due to its smaller size

401 (32), which was not the case. This could reflect lineage-specific purifying selection against IS inserting  
402 into specific genomic regions. Alternatively, some IS are highly specific and target sites of DNA  
403 replication (65,66), motifs upstream of promoters (67,68), and secondary DNA structures (69–71).  
404 Therefore, IS may have had target preferences in the chromosome or megaplasmid within each  
405 lineage if insertion targets vary phylogenetically. These hypotheses should be addressed in future  
406 studies through analyses of RSSC IS target sites and IS fitness effects. The distribution of IS between  
407 the chromosome and megaplasmid was further investigated by comparing the prevalence of IS  
408 subgroups in each genomic region between lineages. Interestingly, although some IS subgroups  
409 inserted into the same genomic region across the RSSC, most IS subgroups inserted into different  
410 regions depending on the host lineage. As IS subgroups tended to have high abundances in specific  
411 lineages and only low abundances in others, this may have arisen through inter-lineage horizontal IS  
412 transfer. IS movement between bacterial lineages has previously been attributed to plasmids (72,73),  
413 integrative and conjugative elements (74), and, rarely, prophages (73). Both integrative and  
414 conjugative elements and prophages have both been found to be lineage-specific (40,41) and  
415 therefore may have limited movement between lineages. However, RSSC strains are naturally  
416 competent and is capable of being transformed with DNA from different lineages (75–77). Therefore,  
417 IS horizontal transmission may occur via plasmids although additional analyses are required to  
418 investigate this.

419           Insertions nearby or inside genes can result in both gene disruption (5,58,78,79) and gene  
420 activation (80–82). In RSSC, IS insertions have been found to disrupt type III effectors (25) and global  
421 virulence regulators (27). We found that the majority of IS (71.4%) were inserted within 100bp of their  
422 closest neighbouring gene's start codon and could potentially have affected gene expression (although  
423 the positions of IS relative to gene promoters is unclear). Such potential IS-associated fitness effects  
424 should be addressed further by analysing gene promoter positions in both the bacterial genomes and  
425 in the IS to determine whether promoters are disrupted or modified. Only 4.9% of IS were found to  
426 disrupt genes despite putative coding sequences comprising approximately 86.8% of the RSSC genome  
427 (32). Similarly, low proportions of IS-mediated gene disruptions have been found in other pathogens  
428 (61), suggesting there may be strong purifying selection against intra-genic insertions. Consistent with  
429 previous analyses (25), IS disruptions were found in various genes with potential roles in bacterial  
430 virulence, competition and stress tolerance, including type III effectors, membrane transporters,  
431 virulence regulators, and proteins involved in antibiotic and oxidative stress tolerance. Most gene  
432 disruptions were found in small genetically similar clades in phylotype I suggesting they have likely  
433 spread through vertical transmission and may provide local adaptive benefits. However, some  
434 disruptions were more widespread, and either found in more genetically distant isolates or spread

435 across different lineages. Except for phylotype IIB disruptions, which were mainly caused by IS5  
436 subgroup IS1021, these disruptions were generally caused by different IS subgroups in different  
437 isolates suggesting they might provide “general” fitness benefits, which are not dependent on the  
438 local environment.

439 In conclusion, this study provides insights into the distribution and potential spread of IS  
440 across the RSSC. Our results highlight that although IS are widespread on the family level, they are  
441 lineage-specific on the subgroup level and are tightly bound to the evolution of their hosts. Further,  
442 while IS generally cause lineage-specific gene disruptions, some genes are disrupted in multiple  
443 lineages by different IS subgroups. Therefore, IS may affect host fitness both within lineages and  
444 across the whole RSSC.

445

## 446 **References**

- 447 1. Arber W. Genetic variation: molecular mechanisms and impact on microbial evolution. *FEMS*  
448 *Microbiology Reviews*. 2000 Jan 1;24(1):1–7.
- 449 2. Mahillon J, Chandler M. Insertion Sequences. *Microbiol Mol Biol Rev*. 1998 Sep;62(3):725–74.
- 450 3. Siguier P, Gourbeyre E, Chandler M. Bacterial insertion sequences: their genomic impact and  
451 diversity. *FEMS Microbiology Reviews*. 2014 Sep 1;38(5):865–91.
- 452 4. Fowler RC, Hanson ND. Emergence of carbapenem resistance due to the novel insertion  
453 sequence ISPa8 in *Pseudomonas aeruginosa*. *PLoS One*. 2014;9(3):e91299.
- 454 5. Boutoille D, Corvec S, Caroff N, Giraudeau C, Espaze E, Caillon J, et al. Detection of an IS21  
455 insertion sequence in the *mexR* gene of *Pseudomonas aeruginosa* increasing beta-lactam  
456 resistance. *FEMS Microbiol Lett*. 2004 Jan 15;230(1):143–6.
- 457 6. Graves JL, Tajkarimi M, Cunningham Q, Campbell A, Nonga H, Harrison SH, et al. Rapid evolution  
458 of silver nanoparticle resistance in *Escherichia coli*. *Front Genet*. 2015;6:42.
- 459 7. Perez M, Calles-Enríquez M, del Rio B, Ladero V, Martín MC, Fernández M, et al. IS256 abolishes  
460 gelatinase activity and biofilm formation in a mutant of the nosocomial pathogen *Enterococcus*  
461 *faecalis* V583. *Can J Microbiol*. 2015 Jul;61(7):517–9.
- 462 8. Garnier F, Janapatla RP, Charpentier E, Masson G, Grélaud C, Stach JF, et al. Insertion sequence  
463 1515 in the *ply* gene of a type 1 clinical isolate of *Streptococcus pneumoniae* abolishes  
464 pneumolysin expression. *J Clin Microbiol*. 2007 Jul;45(7):2296–7.
- 465 9. Benson MA, Ohneck EA, Ryan C, Alonzo F, Smith H, Narechania A, et al. Evolution of  
466 hypervirulence by a MRSA clone through acquisition of a transposable element. *Mol Microbiol*.  
467 2014 Aug;93(4):664–81.



- 468 10. Rezwan F, Lan R, Reeves PR. Molecular basis of the indole-negative reaction in *Shigella* strains:  
469 extensive damages to the *tna* operon by insertion sequences. *J Bacteriol.* 2004  
470 Nov;186(21):7460–5.
- 471 11. Gaffé J, McKenzie C, Maharjan RP, Coursange E, Ferenci T, Schneider D. Insertion sequence-  
472 driven evolution of *Escherichia coli* in chemostats. *J Mol Evol.* 2011 Apr;72(4):398–412.
- 473 12. Lartigue MF, Poirel L, Nordmann P. Diversity of genetic environment of *bla*(CTX-M) genes. *FEMS*  
474 *Microbiol Lett.* 2004 May 15;234(2):201–7.
- 475 13. Lartigue MF, Poirel L, Aubert D, Nordmann P. In vitro analysis of ISEcp1B-mediated mobilization  
476 of naturally occurring beta-lactamase gene *bla*CTX-M of *Kluyvera ascorbata*. *Antimicrob Agents*  
477 *Chemother.* 2006 Apr;50(4):1282–6.
- 478 14. Cluzel PJ, Chopin A, Ehrlich SD, Chopin MC. Phage abortive infection mechanism from  
479 *Lactococcus lactis* subsp. *lactis*, expression of which is mediated by an Iso-ISS1 element. *Appl*  
480 *Environ Microbiol.* 1991 Dec;57(12):3547–51.
- 481 15. Han HJ, Kuwae A, Abe A, Arakawa Y, Kamachi K. Differential expression of type III effector BteA  
482 protein due to IS481 insertion in *Bordetella pertussis*. *PLoS One.* 2011 Mar 10;6(3):e17797.
- 483 16. Wood MS, Byrne A, Lessie TG. IS406 and IS407, two gene-activating insertion sequences for  
484 *Pseudomonas cepacia*. *Gene.* 1991 Aug 30;105(1):101–5.
- 485 17. Bongers RS, Hoefnagel MHN, Starrenburg MJC, Siemerink MAJ, Arends JGA, Hugenholtz J, et al.  
486 IS981-mediated adaptive evolution recovers lactate production by *ldhB* transcription activation  
487 in a lactate dehydrogenase-deficient strain of *Lactococcus lactis*. *J Bacteriol.* 2003  
488 Aug;185(15):4499–507.
- 489 18. Vandecraen J, Chandler M, Aertsen A, Houdt RV. The impact of insertion sequences on bacterial  
490 genome plasticity and adaptability. *Critical Reviews in Microbiology.* 2017 Nov 2;43(6):709–30.
- 491 19. Rajeshwari R, Sonti RV. Stationary-phase variation due to transposition of novel insertion  
492 elements in *Xanthomonas oryzae* pv. *oryzae*. *J Bacteriol.* 2000 Sep;182(17):4797–802.
- 493 20. Chatterjee S, Sonti RV. Virulence deficiency caused by a transposon insertion in the *purH* gene  
494 of *Xanthomonas oryzae* pv. *oryzae*. *Can J Microbiol.* 2005 Jul;51(7):575–81.
- 495 21. González AI, Ruiz ML, Polanco C. A Race-Specific Insertion of Transposable Element IS801 in  
496 *Pseudomonas syringae* pv. *phaseolicola*. *MPMI.* 1998 May;11(5):423–8.
- 497 22. Noël L, Thieme F, Nennstiel D, Bonas U. Two Novel Type III-Secreted Proteins of *Xanthomonas*  
498 *campestris* pv. *vesicatoria* Are Encoded within the *hrp* Pathogenicity Island. *Journal of*  
499 *Bacteriology.* 2002 Mar;184(5):1340–8.
- 500 23. Hanekamp T, Kobayashi D, Hayes S, Stayton MM. Avirulence gene D of *Pseudomonas syringae*  
501 pv. *tomato* may have undergone horizontal gene transfer. *FEBS Lett.* 1997 Sep 22;415(1):40–4.
- 502 24. Kim JF, Charkowski AO, Alfano JR, Collmer A, Beer SV. Sequences Related to Transposable  
503 Elements and Bacteriophages Flank Avirulence Genes of *Pseudomonas syringae*. *MPMI.* 1998  
504 Dec;11(12):1247–52.

- 505 25. Gonçalves OS, Campos KF, de Assis JCS, Fernandes AS, Souza TS, do Carmo Rodrigues LG, et al.  
506 Transposable elements contribute to the genome plasticity of *Ralstonia solanacearum* species  
507 complex. *Microb Genom*. 2020 May;6(5).
- 508 26. Lavie M, Seunes B, Prior P, Boucher C. Distribution and Sequence Analysis of a Family of Type III-  
509 Dependent Effectors Correlate with the Phylogeny of *Ralstonia solanacearum* Strains. *MPMI*.  
510 2004 Aug;17(8):931–40.
- 511 27. Jeong EL, Timmis JN. Novel insertion sequence elements associated with genetic heterogeneity  
512 and phenotype conversion in *Ralstonia solanacearum*. *J Bacteriol*. 2000 Aug;182(16):4673–6.
- 513 28. Alderley CL, Greenrod STE, Friman VP. Plant pathogenic bacterium can rapidly evolve tolerance  
514 to an antimicrobial plant allelochemical [Internet]. *bioRxiv*; 2021 [cited 2022 Feb 14]. p.  
515 2021.05.21.445234. Available from:  
516 <https://www.biorxiv.org/content/10.1101/2021.05.21.445234v2>
- 517 29. Gonçalves OS, Souza F de O, Bruckner FP, Santana MF, Alfenas-Zerbini P. Widespread  
518 distribution of prophages signaling the potential for adaptability and pathogenicity evolution of  
519 *Ralstonia solanacearum* species complex. *Genomics*. 2021 May 1;113(3):992–1000.
- 520 30. Genin S. Molecular traits controlling host range and adaptation to plants in *Ralstonia*  
521 *solanacearum*. *New Phytologist*. 2010;187(4):920–8.
- 522 31. Hayward AC. Biology and Epidemiology of Bacterial Wilt Caused by *Pseudomonas Solanacearum*.  
523 *Annual Review of Phytopathology*. 1991;29(1):65–87.
- 524 32. Remenant B, Coupat-Goutaland B, Guidot A, Cellier G, Wicker E, Allen C, et al. Genomes of three  
525 tomato pathogens within the *Ralstonia solanacearum* species complex reveal significant  
526 evolutionary divergence. *BMC Genomics*. 2010 Jun 15;11(1):379.
- 527 33. How complex is the *Ralstonia solanacearum* species complex. In: *Bacterial wilt disease and the*  
528 *Ralstonia solanacearum* species complex [Internet]. Saint Paul: APS Press; 2005. Available from:  
529 [http://publications.cirad.fr/une\\_notice.php?dk=524964](http://publications.cirad.fr/une_notice.php?dk=524964)
- 530 34. Safni I, Cleenwerck I, De Vos P, Fegan M, Sly L, Kappler U 2014. Polyphasic taxonomic revision of  
531 the *Ralstonia solanacearum* species complex: proposal to emend the descriptions of *Ralstonia*  
532 *solanacearum* and *Ralstonia syzygii* and reclassify current *R. syzygii* strains as *Ralstonia syzygii*  
533 subsp. *syzygii* subsp. nov., *R. solanacearum* phylotype IV strains as *Ralstonia syzygii* subsp.  
534 *indonesiensis* subsp. nov., banana blood disease bacterium strains as *Ralstonia syzygii* subsp.  
535 *celebesensis* subsp. nov. and *R. solanacearum* phylotype I and III strains as  
536 *Ralstoniapseudosolanacearum* sp. nov. *International Journal of Systematic and Evolutionary*  
537 *Microbiology*. 64(Pt\_9):3087–103.
- 538 35. Lowe-Power TM, Hendrich CG, von Roepenack-Lahaye E, Li B, Wu D, Mitra R, et al. Metabolomics  
539 of tomato xylem sap during bacterial wilt reveals *Ralstonia solanacearum* produces abundant  
540 putrescine, a metabolite that accelerates wilt disease. *Environ Microbiol*. 2018 Apr;20(4):1330–  
541 49.
- 542 36. Williamson L, Nakaho K, Hudelson B, Allen C. *Ralstonia solanacearum* Race 3, Biovar 2 Strains  
543 Isolated from Geranium Are Pathogenic on Potato. *Plant Dis*. 2002 Sep;86(9):987–91.

- 544 37. Colburn-Clifford JM, Scherf JM, Allen C. *Ralstonia solanacearum* Dps contributes to oxidative  
545 stress tolerance and to colonization of and virulence on tomato plants. *Appl Environ Microbiol.*  
546 2010 Nov;76(22):7392–9.
- 547 38. Tjou-Tam-Sin NNA, van de Bilt JLJ, Westenberg M, Gorkink-Smits PPMA, Landman NM, Bergsma-  
548 Vlami M. Assessing the Pathogenic Ability of *Ralstonia pseudosolanacearum* (*Ralstonia*  
549 *solanacearum* Phylotype I) from Ornamental *Rosa* spp. *Plants. Front Plant Sci* [Internet]. 2017  
550 [cited 2021 May 12];8. Available from:  
551 <https://www.frontiersin.org/articles/10.3389/fpls.2017.01895/full>
- 552 39. Bocsanczy AM, Huguet-Tapia JC, Norman DJ. Comparative Genomics of *Ralstonia solanacearum*  
553 Identifies Candidate Genes Associated with Cool Virulence. *Frontiers in Plant Science* [Internet].  
554 2017 [cited 2022 Feb 15];8. Available from:  
555 <https://www.frontiersin.org/article/10.3389/fpls.2017.01565>
- 556 40. Gonçalves OS, de Queiroz MV, Santana MF. Potential evolutionary impact of integrative and  
557 conjugative elements (ICEs) and genomic islands in the *Ralstonia solanacearum* species complex.  
558 *Sci Rep.* 2020 Jul 27;10(1):12498.
- 559 41. Greenrod STE, Stoycheva M, Elphinstone J, Friman VP. Global diversity and distribution of  
560 prophages are lineage-specific within the *Ralstonia solanacearum* plant pathogenic bacterium  
561 species complex [Internet]. *bioRxiv*; 2022 [cited 2022 Feb 14]. p. 2021.10.20.465097. Available  
562 from: <https://www.biorxiv.org/content/10.1101/2021.10.20.465097v2>
- 563 42. Xie Z, Tang H. ISEScan: automated identification of insertion sequence elements in prokaryotic  
564 genomes. *Bioinformatics.* 2017 Nov 1;33(21):3340–7.
- 565 43. Hawkey J, Hamidian M, Wick RR, Edwards DJ, Billman-Jacobe H, Hall RM, et al. ISMapper:  
566 identifying transposase insertion sites in bacterial genomes from short read sequence data. *BMC*  
567 *Genomics.* 2015 Sep 3;16(1):667.
- 568 44. Wick RR, Judd LM, Gorrie CL, Holt KE. Unicycler: Resolving bacterial genome assemblies from  
569 short and long sequencing reads. *PLOS Computational Biology.* 2017 Jun 8;13(6):e1005595.
- 570 45. Andrews S. FastQC: a quality control tool for high throughput sequence data. 2010; Available  
571 from: <http://www.bioinformatics.babraham.ac.uk/projects/fastqc>
- 572 46. Bolger AM, Lohse M, Usadel B. Trimmomatic: a flexible trimmer for Illumina sequence data.  
573 *Bioinformatics.* 2014 Aug 1;30(15):2114–20.
- 574 47. Tonkin-Hill G, MacAlasdair N, Ruis C, Weimann A, Horesh G, Lees JA, et al. Producing polished  
575 prokaryotic pangenomes with the Panaroo pipeline. *Genome Biology.* 2020 Jul 22;21(1):180.
- 576 48. Katoh K, Misawa K, Kuma K ichi, Miyata T. MAFFT: a novel method for rapid multiple sequence  
577 alignment based on fast Fourier transform. *Nucleic Acids Res.* 2002 Jul 15;30(14):3059–66.
- 578 49. Nguyen LT, Schmidt HA, von Haeseler A, Minh BQ. IQ-TREE: a fast and effective stochastic  
579 algorithm for estimating maximum-likelihood phylogenies. *Mol Biol Evol.* 2015 Jan;32(1):268–  
580 74.
- 581 50. Ondov BD, Treangen TJ, Melsted P, Mallonee AB, Bergman NH, Koren S, et al. Mash: fast genome  
582 and metagenome distance estimation using MinHash. *Genome Biology.* 2016 Jun 20;17(1):132.

- 583 51. Li H, Durbin R. Fast and accurate short read alignment with Burrows–Wheeler transform.  
584 *Bioinformatics*. 2009 Jul 15;25(14):1754–60.
- 585 52. Li H, Handsaker B, Wysoker A, Fennell T, Ruan J, Homer N, et al. The Sequence Alignment/Map  
586 format and SAMtools. *Bioinformatics*. 2009 Aug 15;25(16):2078–9.
- 587 53. Paradis E, Claude J, Strimmer K. APE: Analyses of Phylogenetics and Evolution in R language.  
588 *Bioinformatics*. 2004 Jan 22;20(2):289–90.
- 589 54. Schliep KP. phangorn: phylogenetic analysis in R. *Bioinformatics*. 2011 Feb 15;27(4):592–3.
- 590 55. Revell LJ. phytools: an R package for phylogenetic comparative biology (and other things).  
591 *Methods in Ecology and Evolution*. 2012;3(2):217–23.
- 592 56. Hutchinson MC, Cagua EF, Balbuena JA, Stouffer DB, Poisot T. paco: implementing Procrustean  
593 Approach to Cophylogeny in R. *Methods in Ecology and Evolution*. 2017;8(8):932–40.
- 594 57. Yu G, Smith DK, Zhu H, Guan Y, Lam TTY. ggtree: an r package for visualization and annotation of  
595 phylogenetic trees with their covariates and other associated data. *Methods in Ecology and*  
596 *Evolution*. 2017;8(1):28–36.
- 597 58. Moffatt JH, Harper M, Adler B, Nation RL, Li J, Boyce JD. Insertion sequence ISAba11 is involved  
598 in colistin resistance and loss of lipopolysaccharide in *Acinetobacter baumannii*. *Antimicrob*  
599 *Agents Chemother*. 2011 Jun;55(6):3022–4.
- 600 59. Simser JA, Rahman MS, Dreher-Lesnick SM, Azad AF. A novel and naturally occurring transposon,  
601 *ISRpe1* in the *Rickettsia peacockii* genome disrupting the *rickA* gene involved in actin-based  
602 motility. *Mol Microbiol*. 2005 Oct;58(1):71–9.
- 603 60. De Palmenaer D, Siguier P, Mahillon J. IS4 family goes genomic. *BMC Evolutionary Biology*. 2008  
604 Jan 23;8(1):18.
- 605 61. Hawkey J, Monk JM, Billman-Jacobe H, Pálsson B, Holt KE. Impact of insertion sequences on  
606 convergent evolution of *Shigella* species. *PLOS Genetics*. 2020 Jul 9;16(7):e1008931.
- 607 62. Consuegra J, Gaffé J, Lenski RE, Hindré T, Barrick JE, Tenailon O, et al. Insertion-sequence-  
608 mediated mutations both promote and constrain evolvability during a long-term experiment  
609 with bacteria. *Nat Commun*. 2021 Feb 12;12(1):980.
- 610 63. Genin S, Boucher C. Lessons learned from the genome analysis of *ralstonia solanacearum*. *Annu*  
611 *Rev Phytopathol*. 2004;42:107–34.
- 612 64. Craig NL. Target site selection in transposition. *Annu Rev Biochem*. 1997;66:437–74.
- 613 65. Hu WY, Derbyshire KM. Target choice and orientation preference of the insertion sequence  
614 *IS903*. *J Bacteriol*. 1998 Jun;180(12):3039–48.
- 615 66. Hoang BT, Pasternak C, Siguier P, Guynet C, Hickman AB, Dyda F, et al. Single-stranded DNA  
616 transposition is coupled to host replication. *Cell*. 2010 Aug 6;142(3):398–408.
- 617 67. Guérillot R, Cunha VD, Sauvage E, Bouchier C, Glaser P. Modular Evolution of TnGBSs, a New  
618 Family of Integrative and Conjugative Elements Associating Insertion Sequence Transposition,  
619 Plasmid Replication, and Conjugation for Their Spreading. *Journal of Bacteriology* [Internet].

- 620 2013 Feb 22 [cited 2022 Feb 13]; Available from:  
621 <https://journals.asm.org/doi/abs/10.1128/JB.01745-12>
- 622 68. Brochet M, Da Cunha V, Couvé E, Rusniok C, Trieu-Cuot P, Glaser P. Atypical association of DDE  
623 transposition with conjugation specifies a new family of mobile elements. *Mol Microbiol*. 2009  
624 Feb;71(4):948–59.
- 625 69. Ramos-González MI, Campos MJ, Ramos JL, Espinosa-Urgel M. Characterization of the  
626 *Pseudomonas putida* Mobile Genetic Element IS<sub>Ppu10</sub>: an Occupant of Repetitive Extragenic  
627 Palindromic Sequences. *J Bacteriol*. 2006 Jan;188(1):37–44.
- 628 70. Clément JM, Wilde C, Bachellier S, Lambert P, Hofnung M. IS1397 is active for transposition into  
629 the chromosome of *Escherichia coli* K-12 and inserts specifically into palindromic units of  
630 bacterial interspersed mosaic elements. *J Bacteriol*. 1999 Nov;181(22):6929–36.
- 631 71. Tobes R, Pareja E. Bacterial repetitive extragenic palindromic sequences are DNA targets for  
632 Insertion Sequence elements. *BMC Genomics*. 2006 Mar 24;7(1):62.
- 633 72. Che Y, Yang Y, Xu X, Břinda K, Polz MF, Hanage WP, et al. Conjugative plasmids interact with  
634 insertion sequences to shape the horizontal transfer of antimicrobial resistance genes. *PNAS*  
635 [Internet]. 2021 Feb 9 [cited 2022 Feb 13];118(6). Available from:  
636 <https://www.pnas.org/content/118/6/e2008731118>
- 637 73. Leclercq S, Cordaux R. DO PHAGES EFFICIENTLY SHUTTLE TRANSPOSABLE ELEMENTS AMONG  
638 PROKARYOTES? *Evolution*. 2011;65(11):3327–31.
- 639 74. Oliveira PH, Touchon M, Cury J, Rocha EPC. The chromosomal organization of horizontal gene  
640 transfer in bacteria. *Nat Commun*. 2017 Oct 10;8(1):841.
- 641 75. Guidot A, Coupat B, Fall S, Prior P, Bertolla F. Horizontal gene transfer between *Ralstonia*  
642 *solanacearum* strains detected by comparative genomic hybridization on microarrays. *ISME J*.  
643 2009 May;3(5):549–62.
- 644 76. Coupat B, Chaumeille-Dole F, Fall S, Prior P, Simonet P, Nesme X, et al. Natural transformation  
645 in the *Ralstonia solanacearum* species complex: number and size of DNA that can be transferred.  
646 *FEMS Microbiol Ecol*. 2008 Oct;66(1):14–24.
- 647 77. Bertolla F, Frostegård Å, Brito B, Nesme X, Simonet P. During Infection of Its Host, the Plant  
648 Pathogen *Ralstonia solanacearum* Naturally Develops a State of Competence and Exchanges  
649 Genetic Material. *MPMI*. 1999 May;12(5):467–72.
- 650 78. Hernández-Allés S, Benedí VJ, Martínez-Martínez L, Pascual A, Aguilar A, Tomás JM, et al.  
651 Development of resistance during antimicrobial therapy caused by insertion sequence  
652 interruption of porin genes. *Antimicrob Agents Chemother*. 1999 Apr;43(4):937–9.
- 653 79. Kobayashi K, Tsukagoshi N, Aono R. Suppression of hypersensitivity of *Escherichia coli* *acrB*  
654 mutant to organic solvents by integrational activation of the *acrEF* operon with the IS1 or IS2  
655 element. *J Bacteriol*. 2001 Apr;183(8):2646–53.
- 656 80. Wachino J ichi, Yamane K, Kimura K, Shibata N, Suzuki S, Ike Y, et al. Mode of transposition and  
657 expression of 16S rRNA methyltransferase gene *rmtC* accompanied by IS<sub>Ecp1</sub>. *Antimicrob Agents*  
658 *Chemother*. 2006 Sep;50(9):3212–5.

659 81. Blount ZD, Barrick JE, Davidson CJ, Lenski RE. Genomic analysis of a key innovation in an  
660 experimental *Escherichia coli* population. *Nature*. 2012 Sep 27;489(7417):513–8.

661 82. Sóni J, Gal M, Brazier JS, Rotimi VO, Urbán E, Nagy E, et al. Molecular investigation of genetic  
662 elements contributing to metronidazole resistance in *Bacteroides* strains. *J Antimicrob*  
663 *Chemother*. 2006 Feb;57(2):212–20.

664

665

## 666 Supplementary figures

667

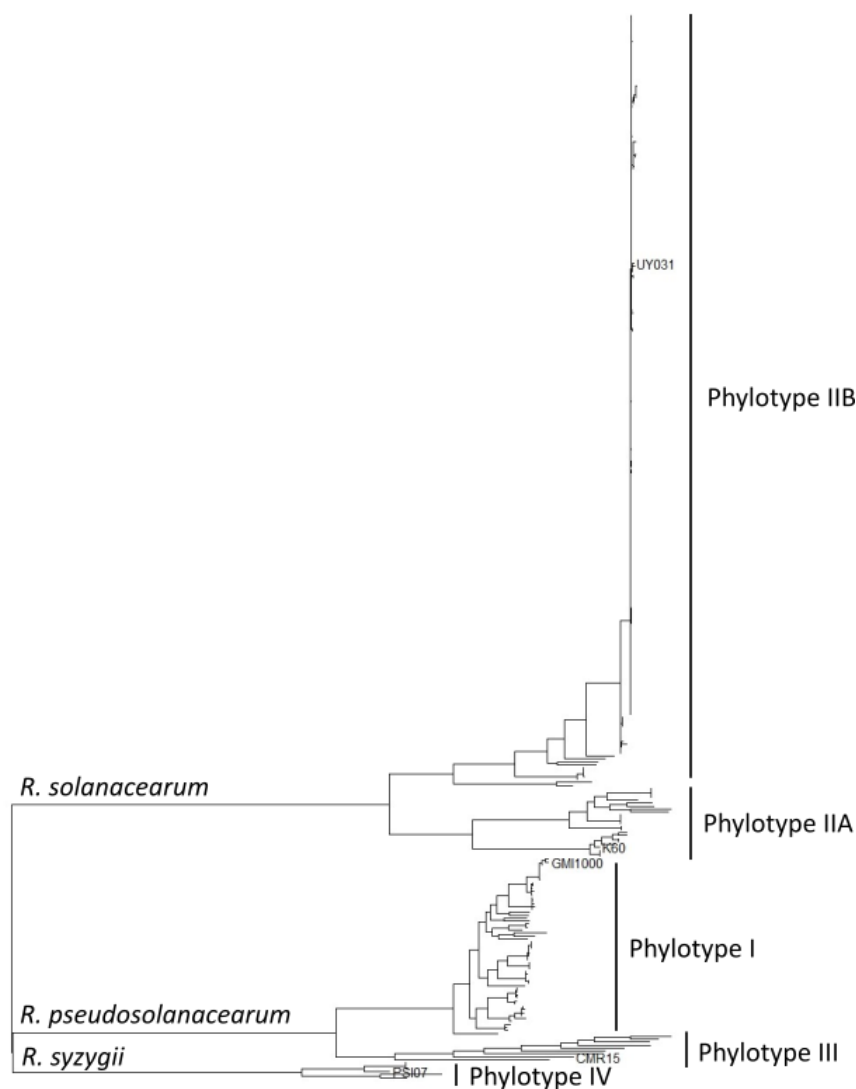

**Figure S1. Phylogeny of *Ralstonia solanacearum* species complex.** Maximum Likelihood phylogeny was constructed based on the genomes of 356 *Ralstonia solanacearum* species complex strains the National Collection of Plant Pathogenic Bacteria (NCPBB) and other reference strains maintained at Fera Science Ltd, along with 5 previously phylotyped and sequenced strains from NCBI Genbank (names shown at the tips of tree). Phylogenetic relationships between known phylotypes were used to assign the 356 strains sequenced in this study to given phylotype clusters

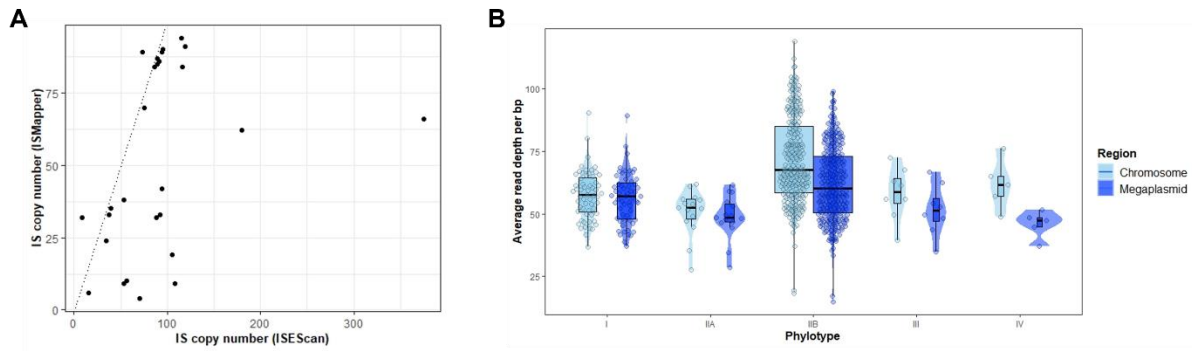

668

669 **Figure S2. Short read IS detection is correlated with long read assemblies and is unaffected by average read depth. A)**  
670 Scatterplot showing IS copy number determined using ISEScan (long read assemblies) against ISMapper (short read data).  
671 Dotted line has slope = 1, intercept = 0 and shows the expected relationship if both methods find the same copy number.  
672 B) Boxplot and violin plot showing average read depth per isolate for each phylotype. Data is scattered to reduce  
673 overplotting. The difference in read depth between phylotypes was tested statistically using a Kruskal-Wallis test.

674

675

676

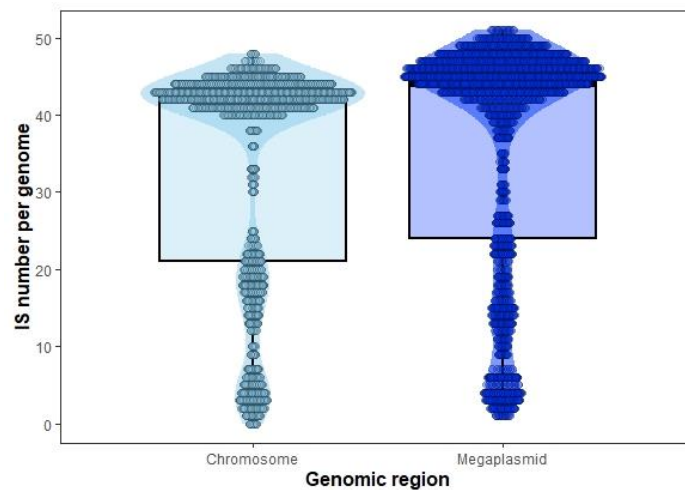

677

678 **Figure S3. The megaplasmid contains significantly more IS than the chromosome.** Boxplot showing IS copy number in the  
679 chromosome and the megaplasmid. Boxplots are coloured by genomic region. The difference in IS number between  
680 regions was tested statistically using a paired t-test.

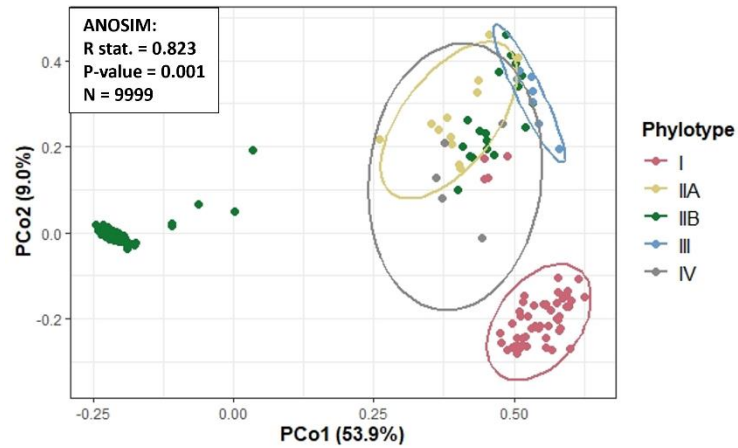

681 **Figure S4. RSSC phylotype lineages have unique IS contents.** PCoA plot based on pairwise isolate IS content Bray-Curtis  
 682 dissimilarities. Points are coloured by host phylotype and an ellipse is plotted showing predicted phylotype point  
 683 distributions. Phylotype IIB does not show an ellipse due to bimodal distribution caused by clonal and non-clonal sub-  
 684 lineages. Box shows the results of ANOSIM including the R statistic (measure of phylotype IS distinguishability), P-value,  
 685 and number of permutations.

686

687

688

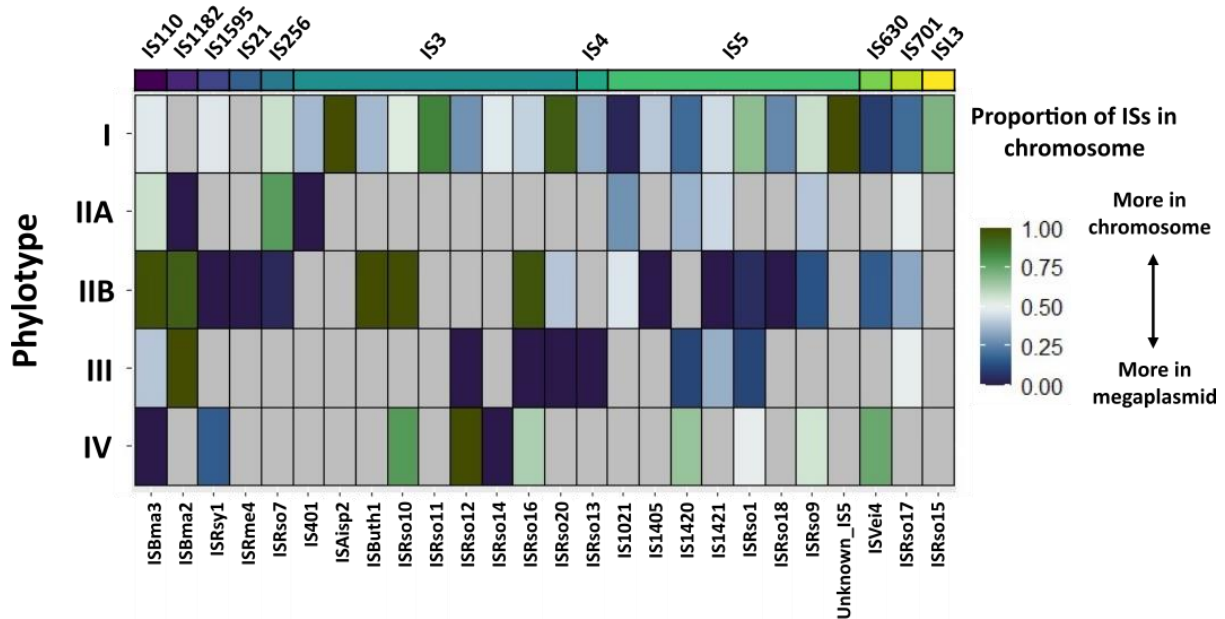

689 **Figure S5. IS subgroups are located in different genomic regions in different lineages.** Heatmap showing the proportion of  
 690 each IS subgroup found in the chromosome in each host lineage (IS subgroup copies in chromosome/total IS subgroup  
 691 copies for each lineage). Cells with a high proportion of chromosomal IS are shown in green and cells with a high  
 692 proportion of megaplasmid IS are shown in blue. Grey cells are where an IS subgroup was not present in the lineage. IS are  
 693 clustered in same order as Figure 2A.



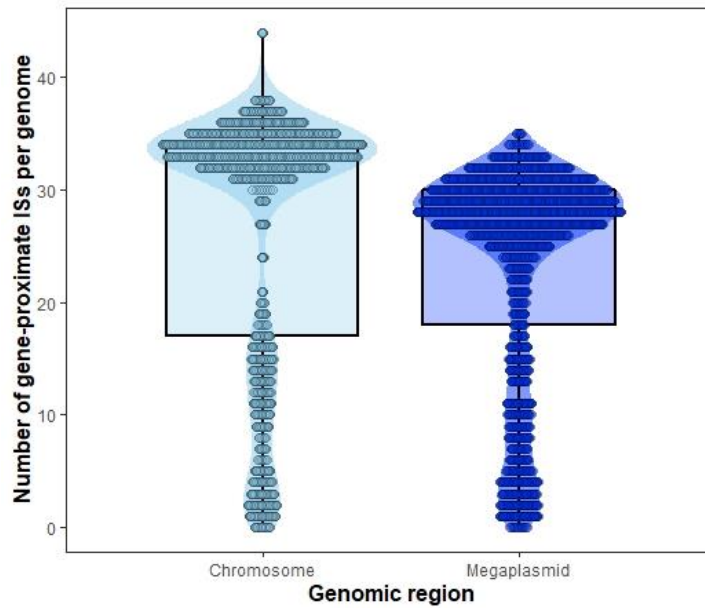

694

695 **Figure S6. The megaplasmid contains significantly fewer gene-proximate IS than the chromosome.** Boxplot showing  
 696 number of IS that are close to (< 100 bp from start codon) or disrupt genes in the chromosome and the megaplasmid.  
 697 Boxplots are coloured by genomic region. The difference in IS number between regions was tested statistically using a  
 698 paired t-test.

699

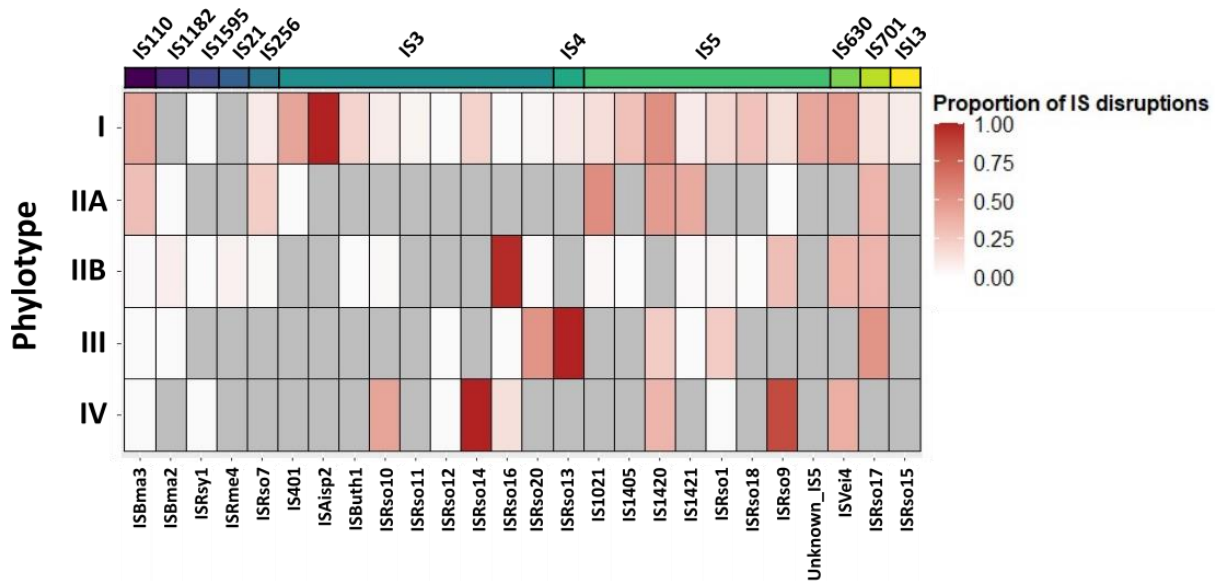

700 **Figure S7. IS gene disruptions are caused by small number of IS subgroups and are lineage-specific.** Heatmap showing the  
 701 proportion of each IS subgroup that cause gene disruptions in each lineage. IS are clustered in the same way as Figure 2A,  
 702 S4.

703

704

705
